# Supplementary material
Source: PubMed Central journal article supplement (PMC4534348)

**A.**                      Uncaging

Current Injection

ACSF + MNI-  
Glutamate

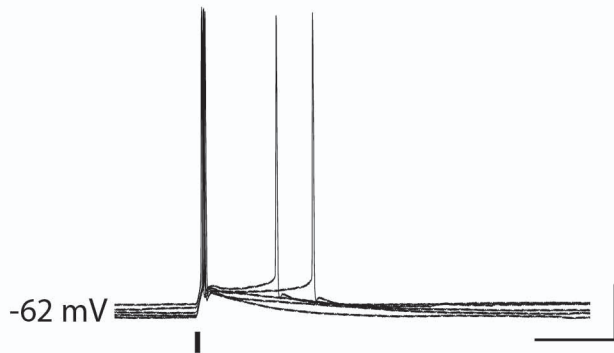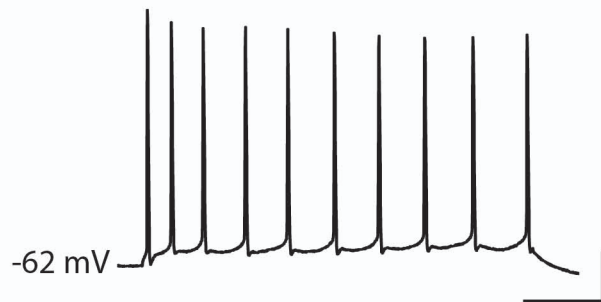

**B.**

ACSF + DNQX,  
CPP, Gabazine,  
MNI- Glutamate

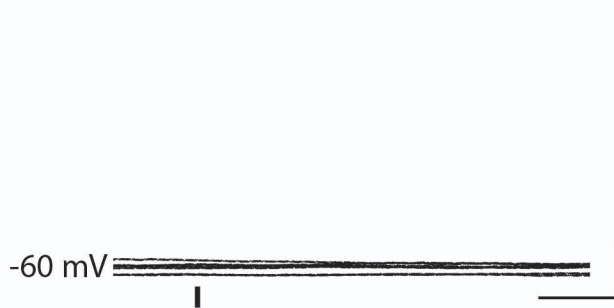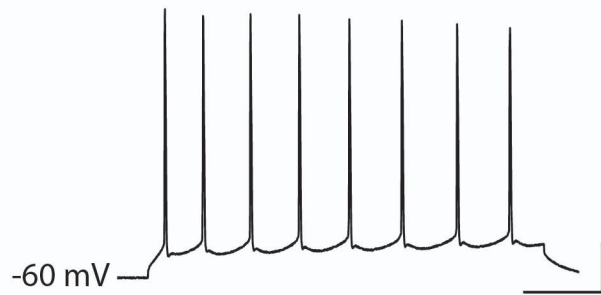

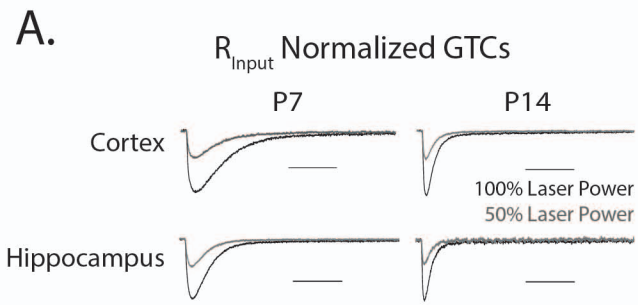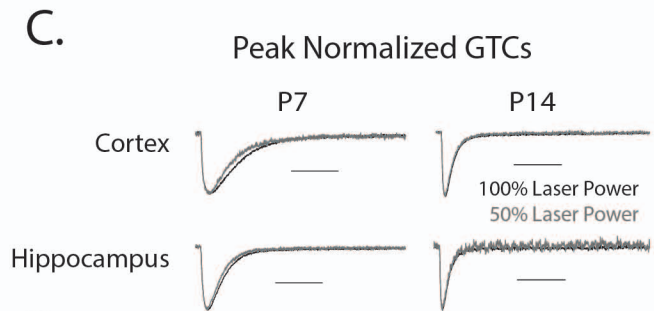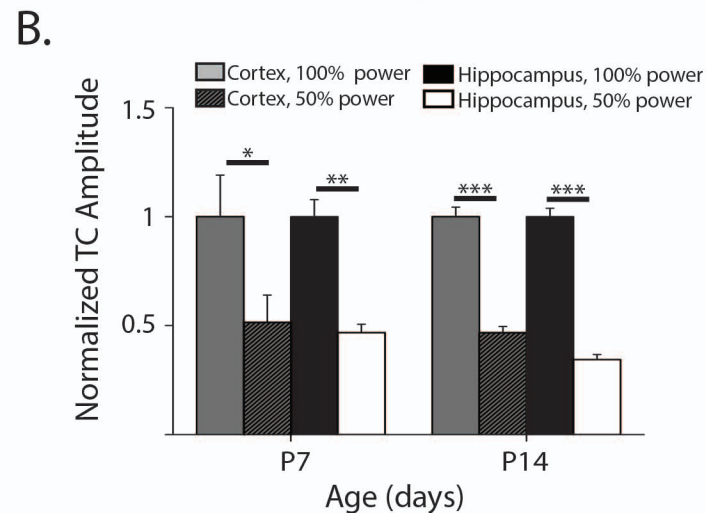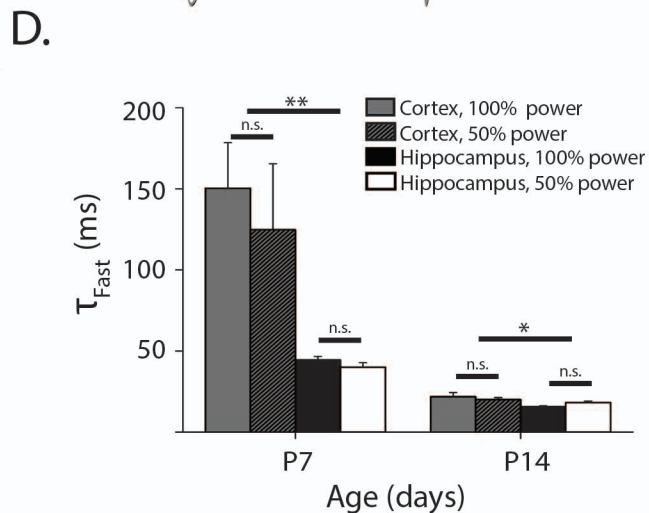

A.

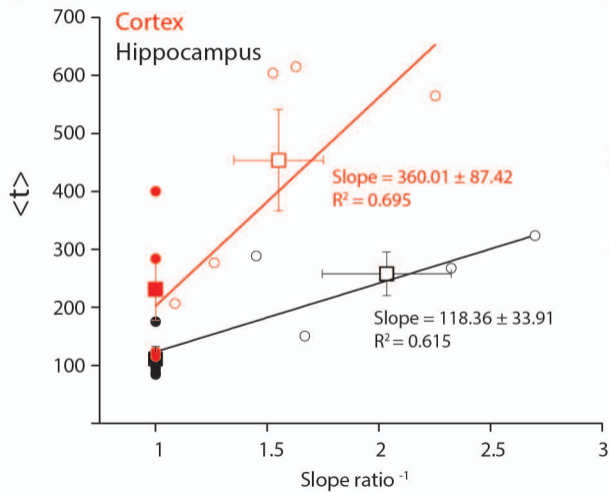

B.

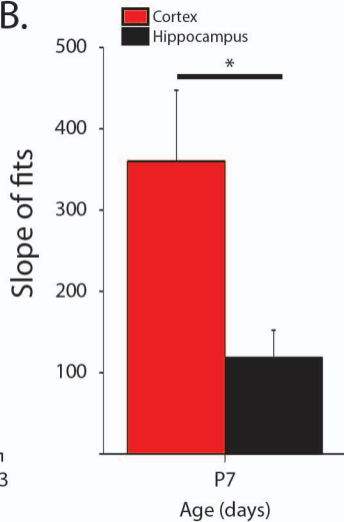

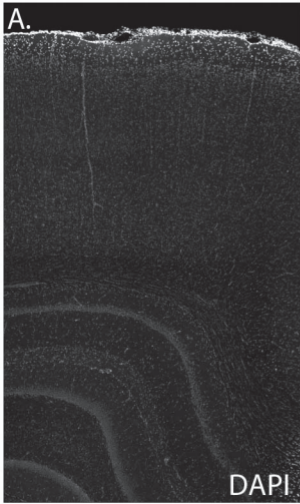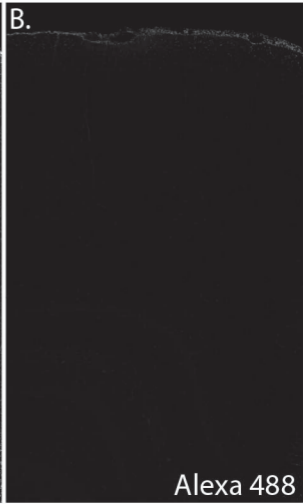

Supplement: NIHMS681491-supplement-Supp_FigureS1-S4.pdf [file NIHMS681491-supplement-Supp_FigureS1-S4.pdf]
